# Supplementary material
Source: ML conference proceedings conference paper supplement (https://aclanthology.org/2021.eacl-main.97)
Supplement: Dataset [file 2021.eacl-main.97.Dataset.zip]

What is your sex?

- ☐ Male
- ☐ Female

What is your age?

- ☐ 18-34 years old
- ☐ 35-49 years old
- ☐ 50-64 years old
- ☐ 65 or more years old

### Upload writing samples

**Submit at least 6500 words total from multiple documents of your own writing** that was done for a formal purpose (school essays, grant proposals, etc). Formatting is not important. If possible please try to avoid writings on very specific topics with lots of highly specialized technical terms and acronyms. Ideally the passages you submit should be reasonably suited for a general audience. All submissions must be your own work. **Please ensure you remove any and all personal information from the documents you submit.**

#### Guidelines to Follow

- The submitted pre-existing writing to be “scholarly” in nature (i.e: a persuasive piece, opinion paper, research paper, journals, etc.).
- Anything that is not the writing content of the work should be

removed (i.e: citations, urls, section headings, editing notes, etc.).

- The papers/samples should have a minimal amount of dialogue/quotations.
- Please refrain from submitting samples of less than 500 words, laboratory and other overly scientific reports, Q&A style samples such as exams, and anything written in another person's style.

**You may submit up to eight documents using the forms below:**

Upload one document here.

Before you submit, please check the following box to acknowledge that you understand that all information you submit through these forms will be added to a public collection of writing samples that may be used for research purposes:

☐ I understand that my submission will be included in a public, open source research repository.

## Experiment

Write approximately 500 words (+/-25) on the following topic.

TOPIC: You are asked as part of a college application to describe your neighborhood to someone who has never been there before. Discuss

the houses, people, stores, parks. Anything you think is relevant.

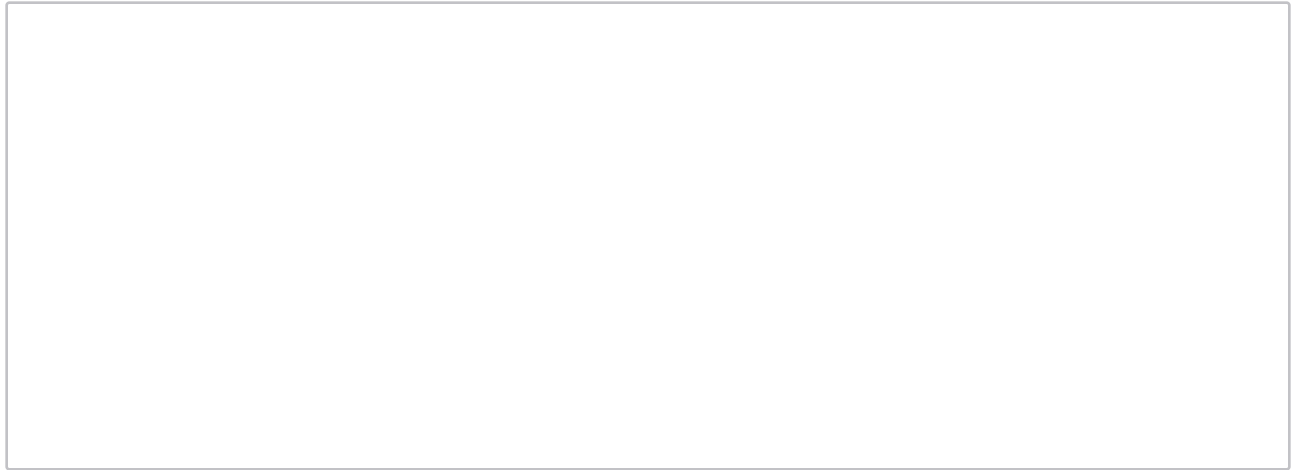A large, empty rectangular box with a thin black border, intended for the user to write their response to the survey question.

Write approximately 500 words (+/-25) on the following topic but in a way in which you are trying to obscure your own writing style. Your goal is to fool the computer into thinking that your passage was NOT written by you. You may use whatever means you wish so long as the writing would not raise any eyebrows when a human reads over it (no scrambled words, mixed up semantics, etc) and the point is still clearly conveyed.

TOPIC: You are asked as part of a college application to describe your neighborhood to someone who has never been there before. Discuss the houses, people, stores, parks. Include anything you think is relevant.
